# Supplementary material
Source: publisher site journal article supplement (https://www.dovepress.com/article/389178)
Supplement: Supplementary file 1 [file get_supplementary_file.php]

# Method

## 1 Experimental Procedure

### 1.1 Evaluation of DNA quality

The quality of isolated genomic DNA was verified by using these three methods in combination:

- 1) DNA degradation and contamination were monitored on 1% agarose gels;
- 2) DNA concentration was measured by Qubit® DNA Assay Kit in Qubit® 3.0 Fluorometer (Invitrogen, USA).

### 1.2 Library Preparation

The exome sequences were efficiently enriched from 0.4 µg genomic DNA using Agilent liquid capture system (Agilent SureSelect Human All Exon V6) according to the manufacturer's protocol. Firstly, qualified genomic DNA was randomly fragmented to an average size of 180-280bp by Covaris S220 sonicator. Remaining overhangs were converted into blunt ends via exonuclease polymerase activities. Secondly, DNA fragments were end repaired and phosphorylated, followed by A-tailing and ligation at the 3' ends with paired-end adaptors. DNA fragments with ligated adapter molecules on both ends were selectively enriched in a PCR reaction. After PCR reaction, libraries hybridize with liquid phase with biotin labeled probe, then use magnetic beads with streptomycin to capture the exons of genes. Captured libraries were enriched in a PCR reaction to add index tags to prepare for sequencing. Products were purified using AMPure XP system (Beckman Coulter, Beverly, USA), DNA concentration was measured by Qubit®3.0 Fluorometer (Invitrogen, USA), libraries were analyzed for size distribution by NGS3K/Caliper and quantified by real-time PCR (3 nM). At last, DNA library were sequenced on Illumina for pairedend 150bp reads

### 1.3 Clustering & Sequencing

## 2 Bioinformatics Analysis Pipeline

### 2.1. Data Quality Control

#### 2.1.1. Raw data

The original fluorescence image files obtained from Illumina platform are transformed to short reads (Raw data) by base calling and these short reads are recorded in FASTQ format, which contains sequence information and corresponding sequencing quality information.

#### 2.1.2. Evaluation of data (Data quality control)

Sequence artifacts, including reads containing adapter contamination, low-quality nucleotides and unrecognizable nucleotide (N), undoubtedly set the barrier for the subsequent reliable bioinformatics analysis. Hence quality control is an essential step and applied to guarantee the meaningful downstream analysis.

All the downstream bioinformatics analyses were based on the high quality clean data, which were retained after these steps. At the same time, QC statistics including total reads number, raw data, raw depth, sequencing error rate and percentage of reads with Q30 (the percent of bases with phred-scaled quality scores greater than 30) were calculated and summarized.

### 2.2. Reads Mapping to Reference Sequence

Valid sequencing data is mapped to the reference genome (GRCh37/hg19/ GRCh38) by BurrowsWheeler Aligner (BWA) software to get the original mapping result in BAM format. Subsequently, Samtools and Sambamba are respectively utilized to sort bam files, do duplicate-marking to generate final bam file. If one or one pair read(s) has multiple mapping positions, the strategy adopted by BWA are to select the best one, if there are multi best mapping position, we randomly pick one. Mapping step is very difficult due to mismatches, including true mutation and sequencing error, and duplicates resulted from PCR amplification. These duplicate reads are uninformative and shouldn't be considered as evidence for variants. Sambamba is employed to mark these duplicates so that we will ignore them in the following analysis.

### **2.3. Variant detection**

SAMtools mpileup and bcftools were used to do variant calling and identify SNP, InDels.

### **2.4. Somatic mutation calling**

The somatic SNV was detected by muTect, the somatic InDel by Strelka, and Control-FREEC was used to detect somatic CNV

### **2.5. Annotation**

ANNOVAR is performed to do annotation for VCF file obtained in the previous step. The variant position, variant type, conservative prediction and other information are obtained at this step through a variety of databases, such as dbSNP, 1000 Genome, esp6500, GnomAD, CADD, HGMD and COSMIC, and so on. Since we are interested in exonic variants, gene transcript annotation databases, such as Consensus CDS, RefSeq, Ensemble and UCSC, are also applied for annotation to determine amino acid alternation. Functional annotation is very important because the link between genetic variation and cancer can be found. In this step, the databases mainly include GO, KEGG, Reactome, Biocarta, PID, and so on.

# Result

## 1 Sequencing depth and coverage

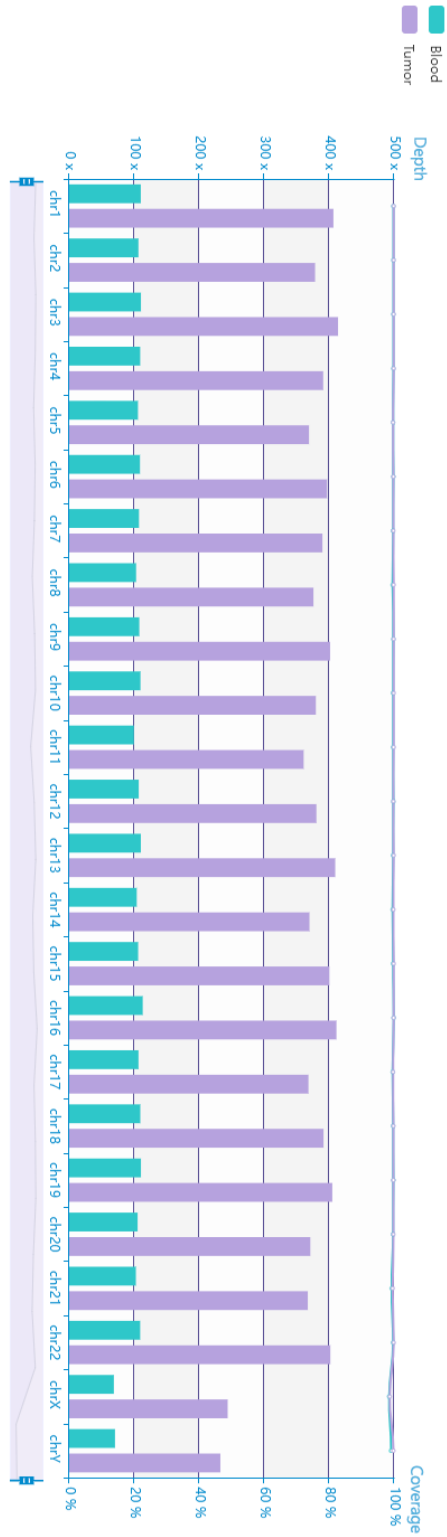

## 2 The outcome of somatic mutation

### 2.1 Single nucleotide variant(SNV)

| Sample         | Xuezheng_Tumor |
|----------------|----------------|
| CDS            | 3              |
| synonymous_SNP | 1              |
| missense_SNP   | 2              |
| stopgain       | 0              |
| stoploss       | 0              |
| unknown        | 0              |
| intronic       | 53             |
| UTR3           | 6              |
| UTR5           | 1              |
| splicing       | 2              |
| ncRNA_exonic   | 7              |
| ncRNA_intronic | 10             |
| ncRNA_UTR3     | 0              |
| ncRNA_UTR5     | 0              |
| ncRNA_splicing | 1              |
| upstream       | 3              |
| downstream     | 2              |
| intergenic     | 23             |
| Others         | 0              |
| Total          | 111            |

### 2.2 Insertion and Deletion(InDel)

| Sample                  | Xuezheng_Tumor |
|-------------------------|----------------|
| CDS                     | 0              |
| frameshift_deletion     | 0              |
| frameshift_insertion    | 0              |
| nonframeshift_deletion  | 0              |
| nonframeshift_insertion | 0              |
| stopgain                | 0              |
| stoploss                | 0              |
| unknown                 | 0              |
| intronic                | 0              |
| UTR3                    | 0              |
| UTR5                    | 0              |
| splicing                | 0              |
| ncRNA_exonic            | 0              |
| ncRNA_intronic          | 0              |
| ncRNA_UTR3              | 0              |
| ncRNA_UTR5              | 0              |

|                |   |
|----------------|---|
| ncRNA_splicing | 0 |
| upstream       | 0 |
| downstream     | 0 |
| intergenic     | 0 |
| Others         | 0 |
| <hr/>          |   |
| Total          | 0 |

# SNV list

|             |              |                                                                    |                     |                |                     |                     |                     |                |                          |                 |                     |                |                               |
|-------------|--------------|--------------------------------------------------------------------|---------------------|----------------|---------------------|---------------------|---------------------|----------------|--------------------------|-----------------|---------------------|----------------|-------------------------------|
| Priority    | L            | L                                                                  | L                   | L              | L                   | L                   | L                   | L              | L                        | L               | L                   | L              | L                             |
| CHROM       | chr6         | chr1                                                               | chr7                | chr9           | chr15               | chr12               | chr22               | chr2           | chr7                     | chr15           | chr17               | chr17          | chr11                         |
| POS         | 5575<br>9124 | 1615<br>1393<br>3                                                  | 6576<br>3276        | 4164<br>8075   | 2040<br>8438        | 15934               | 2465<br>7860        | 12998<br>0059  | 4996<br>980              | 10197<br>5947   | 41105<br>795        | 41105<br>831   | 1097926                       |
| ID          | .            | rs409<br>763                                                       | rs368<br>0944<br>33 | .              | rs112<br>3557<br>17 | rs797<br>03804<br>9 | rs200<br>1116<br>41 | rs675<br>0772  | rs963<br>9891            | rs1998<br>37286 | rs756<br>54580<br>1 | rs7539<br>2608 | .                             |
| REF         | T            | G                                                                  | T                   | T              | A                   | T                   | A                   | G              | C                        | C               | A                   | A              | C                             |
| ALT         | C            | A                                                                  | C                   | C              | G                   | G                   | G                   | C              | G                        | G               | G                   | C              | G                             |
| QUAL        | .            | .                                                                  | .                   | .              | .                   | .                   | .                   | .              | .                        | .               | .                   | .              | .                             |
| FILTER      | PASS         | PASS                                                               | PASS                | PASS           | PASS                | PASS                | PASS                | PASS           | PASS                     | PASS            | PASS                | PASS           | PASS                          |
| GeneName    | BMP5         | FCGR2A                                                             | CCT6P1              | FAM27E2        | HERC2P3             | LOC100288778        | POM121L10P          | RAB6C-AS1      | RNF216P1                 | WASH3P          | KRTA4-9             | KRTAP4-9       | MUC2                          |
| Description |              | Fc fragment of Bone IgG, morphologic protein-5 receptor for (CD32) |                     |                |                     |                     |                     |                |                          |                 |                     |                | Mucin 2, intestinal /tracheal |
| Func        | splicing     | splicing                                                           | ncRNA_A_splicing    | ncRNA_A_exonic | ncRNA_A_exonic      | ncRNA_A_exonic      | ncRNA_A_exonic      | ncRNA_A_exonic | ncRNA_A_exonic           | ncRNA_exonic    | exonic              | exonic         | exonic                        |
| ExonicFunc  | .            | .                                                                  | .                   | .              | .                   | .                   | .                   | .              | .                        | .               | missense SNV        | missense SNV   | synonymous SNV                |
| Gene        | NM_021073    | NM_036219, NM_021642                                               | NR_003110           | NR_003071      | NR_003643           | NR_0130745          | NR_0024593          | NR_006537      | NR_009023384, NR_0023385 | NR_003659       | NM_001146041        | NM_001146041   | NM_002457                     |







|                         | rs409763 | rs368094433 | rs112355717 | rs797038049 | rs200111641 | rs6750772 | rs9639891 | rs199837286 | rs756545801 | rs75392608 |
|-------------------------|----------|-------------|-------------|-------------|-------------|-----------|-----------|-------------|-------------|------------|
| avsnp150                | .        | .           | .           | .           | .           | .         | .         | .           | .           | .          |
| clinvar_20190305        | .        | .           | .           | .           | .           | .         | .         | .           | .           | .          |
| gwasCatalognew          | .        | .           | .           | .           | .           | .         | .         | .           | .           | .          |
| 1000g2015aug_Chinese    | .        | .           | .           | .           | .           | .         | 0.24      | .           | .           | .          |
| 1000g2015aug_eas        | .        | .           | .           | .           | .           | .         | 0.25      | .           | .           | .          |
| 1000g2015aug_all        | .        | .           | .           | .           | .           | .         | 0.14      | .           | .           | .          |
| esp6500siv2_all         | .        | .           | .           | .           | .           | .         | .         | .           | .           | .          |
| GnomAD_exome_AF_popmax  | 0        | .           | .           | .           | .           | .         | .         | #####       | 0.001       | .          |
| GnomAD_exome_AF_eas     | 0        | .           | .           | .           | .           | .         | .         | 3E-04       | 3E-04       | 0.001      |
| GnomAD_genome_AF_popmax | 0        | 0           | 0.31        | .           | 0           | 0.119     | 0.11      | 0.028       | 0.001       | 0.005      |
| GnomAD_genome_AF_eas    | 0.01     | 0           | 0.3         | .           | 0           | 0.136     | 0.26      | 0.007       | 0.005       | 0.005      |
| NovoDb_WES              | 0.02     | .           | .           | .           | .           | .         | .         | .           | .           | .          |
| NovoDb_WGS              | .        | .           | 0.2         | .           | .           | 0.109     | 0.25      | .           | 0.004       | 0.004      |
| dbSNP_SCORE             | 0.0003   | 1.0000      | .           | .           | .           | .         | .         | .           | .           | .          |
| Interpro_domain         | .        | .           | .           | .           | .           | .         | .         | .           | .           | .          |
| SIFT                    | .        | .           | .           | .           | .           | .         | .         | .           | 1.0,T       | 0.899,T    |
| Polyphen2_HDIV          | .        | .           | .           | .           | .           | .         | .         | .           | 0.0,B       | 0.0,B      |
| Polyphen2_HVAR          | .        | .           | .           | .           | .           | .         | .         | .           | 0.0,B       | 0.0,B      |
| LRT                     | .        | .           | .           | .           | .           | .         | .         | .           | 0.421,N     | 0.002,N    |
| MutationTaster          | 0.999    | .           | .           | .           | .           | .         | .         | .           | 1,N         | 1,N        |
| MutationAssessor        | .        | .           | .           | .           | .           | .         | .         | .           | 1.29,N      | 3.205,N    |
| FATHMM                  | .        | .           | .           | .           | .           | .         | .         | .           | 2.2,T       | 6.59,T     |

|                     |                                                   |                                                   |                                                   |                                           |                                            |                                        |                                            |                                               |                                            |                                        |                                           |                                           |                                         |   |
|---------------------|---------------------------------------------------|---------------------------------------------------|---------------------------------------------------|-------------------------------------------|--------------------------------------------|----------------------------------------|--------------------------------------------|-----------------------------------------------|--------------------------------------------|----------------------------------------|-------------------------------------------|-------------------------------------------|-----------------------------------------|---|
| CADD_raw            | 1.75                                              |                                                   |                                                   |                                           |                                            |                                        |                                            |                                               |                                            |                                        | 2.089                                     | 2.107                                     |                                         |   |
|                     | 2,14                                              |                                                   |                                                   |                                           |                                            |                                        |                                            |                                               |                                            |                                        | ,0.00                                     | ,0.00                                     |                                         |   |
|                     | .71                                               |                                                   |                                                   |                                           |                                            |                                        |                                            |                                               |                                            |                                        | 1                                         | 1                                         |                                         |   |
| SiPhy_29way_logOdds | 7.87                                              |                                                   |                                                   |                                           |                                            |                                        |                                            |                                               |                                            |                                        | 7.549                                     | 2.384                                     |                                         |   |
| gerp++gt2           | 2.16                                              | 2.1                                               |                                                   |                                           | 2.51                                       |                                        |                                            |                                               |                                            |                                        |                                           |                                           |                                         |   |
| REVEL               |                                                   |                                                   |                                                   |                                           |                                            |                                        |                                            |                                               |                                            |                                        | 0.194                                     | 0.013                                     | 0.029                                   |   |
| cosmic70            |                                                   |                                                   |                                                   |                                           |                                            |                                        |                                            |                                               |                                            |                                        |                                           |                                           |                                         |   |
| ExAC_AL             | 0                                                 |                                                   |                                                   |                                           |                                            |                                        |                                            |                                               |                                            |                                        | 2E-04                                     | 0.001                                     |                                         |   |
| ExAC_EAS            | 0.01                                              |                                                   |                                                   |                                           |                                            |                                        |                                            |                                               |                                            |                                        | 0.001                                     | 4E-04                                     |                                         |   |
| INFO                | DB;S<br>OMA<br>TIC;<br>VT=<br>SNP                 | DB;S<br>OMA<br>TIC;<br>VT=<br>SNP                 | SOM<br>ATIC<br>;VT=<br>SNP                        | SOM<br>ATIC<br>;VT=<br>SNP                | DB;S<br>OMA<br>TIC;<br>VT=<br>SNP          | SOMA<br>TIC;V<br>T=SN<br>P             | DB;S<br>OMA<br>TIC;<br>VT=S<br>NP          | DB;S<br>OMAT<br>IC;VT<br>=SNP                 | DB;S<br>OMA<br>TIC;<br>VT=<br>SNP          | DB;SO<br>MATIC<br>;VT=<br>SNP          | SOMA<br>TIC;V<br>T=SN<br>P                | SOMA<br>TIC;V<br>T=SN<br>P                | SOMATI<br>C;VT=S<br>NP                  |   |
| FORMAT              | GT:A<br>D:BQ<br>:DP:<br>FA:S<br>S                 | GT:<br>AD:<br>BQ:<br>:DP:F<br>A:S<br>S            | GT:A<br>D:BQ<br>:DP:<br>FA:S<br>S                 | GT:A<br>D:BQ<br>:DP:<br>FA:S<br>S         | GT:<br>AD:B<br>Q:DP<br>:FA:<br>SS          | GT:A<br>D:BQ<br>:DP:F<br>A:SS          | GT:A<br>D:BQ<br>:DP:<br>FA:S<br>S          | GT:A<br>D:BQ<br>:DP:F<br>A:SS                 | GT:A<br>D:BQ<br>:DP:<br>FA:S<br>S          | GT:A<br>D:BQ<br>:DP:FA<br>:SS          | GT:A<br>D:BQ<br>:DP:F<br>A:SS             | GT:A<br>D:BQ<br>:DP:FA<br>:SS             | GT:AD:<br>BQ:DP:F<br>A:SS               |   |
| Xuezheng_Blood      | 0:27<br>,0:<br>:27:<br>0.00<br>:0                 | 0:37<br>,1:<br>:38:<br>0.02<br>6:0                | 0:58<br>,1:<br>:59:<br>0.01<br>7:0                | 0:8,<br>0:<br>8:0.<br>00:0                | 0:14<br>,0:<br>:14:<br>0.00<br>:0          | 0:12,<br>0:<br>:14:<br>0:0.0<br>0:0    | 0:15<br>,0:<br>:15:<br>0.00<br>:0          | 0:40,<br>1:<br>:40:<br>1:0.0<br>24:0          | 0:9,<br>0:<br>9:0.<br>00:0                 | 0:10,<br>0:<br>:10:<br>:0.00<br>:0     | 0:35,<br>1:<br>:35:<br>7:0.0<br>28:0      | 0:40,<br>1:<br>:40:<br>1:0.0<br>24:0      | 0:25,0:<br>:<br>:16:0.<br>00:0          |   |
| Xuezheng_Tumor      | 0/1:<br>187,<br>22:3<br>7:21<br>0:0.<br>105:<br>2 | 0/1:<br>163,<br>18:3<br>7:18<br>2:0.<br>099:<br>2 | 0/1:<br>115,<br>12:3<br>7:12<br>7:0.<br>094:<br>2 | 0/1:<br>0,15<br>:37:<br>15:1<br>:00:<br>2 | 0/1:<br>22,5<br>:37:<br>27:0<br>:185<br>:2 | 0/1:1<br>3,5:3<br>7:18:<br>0.278<br>:2 | 0/1:<br>35,8<br>:37:<br>43:0<br>:186<br>:2 | 0/1:<br>164,1<br>3:37:<br>177:0<br>:073:<br>2 | 0/1:<br>29,1<br>:39:<br>39:<br>0.25<br>6:2 | 0/1:4<br>3,9:3<br>5:52:<br>0.173<br>:2 | 0/1:1<br>12,13<br>:36:1<br>25:0.<br>104:2 | 0/1:1<br>34,22<br>:36:1<br>56:0.<br>141:2 | 0/1:46,<br>7:37:53<br>:<br>:0.132:<br>2 |   |
| Ori_REF             | T                                                 | G                                                 | T                                                 | T                                         | A                                          | T                                      | A                                          | G                                             | C                                          | C                                      | A                                         | A                                         | C                                       |   |
| Ori_ALT             | C                                                 | A                                                 | C                                                 | C                                         | G                                          | G                                      | G                                          | C                                             | G                                          | G                                      | G                                         | C                                         | G                                       |   |
| shared_hom          | 0                                                 | 0                                                 | 0                                                 | 0                                         | 0                                          | 0                                      | 0                                          | 0                                             | 0                                          | 0                                      | 0                                         | 0                                         | 0                                       | 0 |
| shared_het          | 0                                                 | 0                                                 | 0                                                 | 0                                         | 0                                          | 0                                      | 0                                          | 0                                             | 0                                          | 0                                      | 0                                         | 0                                         | 0                                       | 0 |

ID=CO  
SM393  
2020;  
OCCU  
RENCE  
=3(uri  
nary\_tr  
act)



|          |             |  |                                                                                                                                                                                                                                                 |
|----------|-------------|--|-------------------------------------------------------------------------------------------------------------------------------------------------------------------------------------------------------------------------------------------------|
|          | 1991        |  |                                                                                                                                                                                                                                                 |
|          | 5573        |  |                                                                                                                                                                                                                                                 |
|          | 1536        |  |                                                                                                                                                                                                                                                 |
|          | 7919        |  |                                                                                                                                                                                                                                                 |
|          | 2565        |  |                                                                                                                                                                                                                                                 |
|          | 886 2       |  |                                                                                                                                                                                                                                                 |
|          | 9653        |  |                                                                                                                                                                                                                                                 |
|          | 89 24       |  |                                                                                                                                                                                                                                                 |
|          | 1421        |  |                                                                                                                                                                                                                                                 |
|          | 5 168       |  |                                                                                                                                                                                                                                                 |
|          | 1158 3644   |  | 9722984                                                                                                                                                                                                                                         |
|          | 0864  1901  |  | 1980995                                                                                                                                                                                                                                         |
|          | 2263 1614   |  | 2703501                                                                                                                                                                                                                                         |
|          | 636 1 2260  |  | 1985113                                                                                                                                                                                                                                         |
|          | 0677 8500   |  | 1675487                                                                                                                                                                                                                                         |
|          | 507 1 9843  |  | 7 170580                                                                                                                                                                                                                                        |
| PubMedID | 4279 982 1  |  | 67 22658                                                                                                                                                                                                                                        |
|          | 04 13 3011  |  | 29 89757                                                                                                                                                                                                                                        |
|          | 3931 70 25  |  | 11 15081                                                                                                                                                                                                                                        |
|          | 6 863 2173  |  | 123 2407                                                                                                                                                                                                                                        |
|          | 0036  2 213 |  | 2822 786                                                                                                                                                                                                                                        |
|          | 5319 9735   |  | 4825 106                                                                                                                                                                                                                                        |
|          | 761 1700    |  | 36731 18                                                                                                                                                                                                                                        |
|          | 5690        |  | 85763 11                                                                                                                                                                                                                                        |
|          | 8636        |  | 872843                                                                                                                                                                                                                                          |
|          | 449 2       |  |                                                                                                                                                                                                                                                 |
|          | 9716        |  |                                                                                                                                                                                                                                                 |
|          | 15 19       |  |                                                                                                                                                                                                                                                 |
|          | 9658        |  |                                                                                                                                                                                                                                                 |
|          | 03 10       |  |                                                                                                                                                                                                                                                 |
|          | 6753        |  |                                                                                                                                                                                                                                                 |
|          | 63 26       |  |                                                                                                                                                                                                                                                 |
|          | 4362        |  |                                                                                                                                                                                                                                                 |
| GO_BP    |             |  | DIGESTI<br>ON; SYS<br>TEM_PR<br>ROTEIN<br>ACEOUS<br>_EXTRA<br>CELLULA<br>R_MATRI<br>X; EXTR<br>CELLUL<br>AR_REGI<br>ON; EXT<br>RACELL<br>ULAR_RE<br>GION_PA<br>STRUCT<br>URAL_M<br>OLECULE<br>_ACTIVI<br>TY; EXT<br>RACELL<br>ULAR_M<br>ATRIX_S |
| GO_CC    |             |  |                                                                                                                                                                                                                                                 |
| GO_MF    |             |  |                                                                                                                                                                                                                                                 |

|          |      |         |
|----------|------|---------|
|          | KEGG |         |
|          | _FC_ |         |
|          | GAM  |         |
|          | MA_  |         |
|          | R_ME |         |
| KEGG_PA  | KEGG |         |
| THWAY    | _HED | DIAT    |
|          | GEHO | ED_P    |
|          | G_SI | HAG     |
|          | GNAL | OCY     |
|          | ING_ | TOSI    |
|          | PATH | S;KE    |
|          | WAY  | GG_L    |
|          | ;KEG | EISH    |
|          | G_TG | MAN     |
|          | F_BE | IA_I    |
|          | TA_S | NFEC    |
|          | IGNA | TION    |
|          | LING | ;KEG    |
|          | _PAT | G_S     |
|          | HWA  | YSTE    |
|          | Y    | MIC_    |
|          |      | LUPU    |
|          |      | S_ER    |
|          |      | YTHE    |
|          |      | MAT     |
|          |      | OSU     |
|          |      | PID_    |
|          |      | PTP1    |
|          |      | BPAT    |
| PID_PATH |      | HWA     |
| WAY      |      | Y;PI    |
|          |      | D_IN    |
|          |      | TEGR    |
|          |      | IN2_    |
|          |      | PATH    |
|          |      | WAY     |
| BIOCART  | BIOC |         |
| A_PATH   | ART  |         |
| WAY      | A_AL |         |
|          | K_PA |         |
|          | THW  |         |
|          | AY   |         |
|          |      | KEGG_VI |
|          |      | BRIO_CH |
|          |      | OLERAE_ |
|          |      | INFECTI |
|          |      | ON      |

REACTOM  
E\_PATHW  
AY

REACTO  
ME\_O\_LI  
NKED\_GL  
YCOSYL  
ATION\_  
OF\_MUC  
INS;REA  
CTOME\_  
TERMIN  
ATION\_  
OF\_O\_G  
LYCAN\_  
BIOSYNT  
HESIS;R  
EACTOM  
E\_META  
BOLISM\_  
OF\_PRO  
TEINS;R
